# Supplementary material for: Genetic characteristics of non-familial epilepsy
Source: PeerJ. 2019 Dec 19;7:e8278. doi: 10.7717/peerj.8278 (PMC6925949; doi:10.7717/peerj.8278)
Supplement: Supplemental Information 1 [file peerj-07-8278-s001.xlsx]

## Sheet: 243 cases CRF
Gender	Current_Age	Drug_AE	Epilepsy_Op	SzOnset_Age	SzFreq_Y	Febrileseizure	Stausepilepticus	Pt_ID	SzClass	Classification_1	Brainimaging	brainimaing-add	EEGfinding	AED_Response
M	52	No	No	43	0	No	No	DK002	Primary GTC	IGE	WNL		WNL	0
M	46	No	No	31	0	No	No	DK003	Secondary GTC, Simple Partial (Motor)	LRE	Others	Frontal lobe old hemorrhag	WNL	0
F	39	No	No	12	15	Yes	No	DK008	Complex Partial, Secondary GTC	LRE	Others	HS	Spike-wave complex	1
M	46	No	No	19	15	No	No	DK009	Complex Partial, Secondary GTC	LRE	WNL		Spike-wave complex	1
M	54	No	Yes	5	20	No	No	DK010	Complex Partial, Secondary GTC	LRE	Others	encephalonarcosis	Spike-wave complex	1
F	57	Yes	No	24	15	No	No	DK011	Complex Partial	LRE	Others	Occipital calification	Not done	1
F	24	Yes	No	21	0	No	No	DK013	Complex Partial	LRE	WNL	Normal	Spike-wave complex	0
F	34	Yes	No	15	15	No	No	DK015	Complex Partial, Secondary GTC	LRE	WNL		Slow only	1
M	50	Yes	No	32	12	No	No	DK018	Complex Partial, Secondary GTC	LRE	WNL	Normal	Spike-wave complex	1
M	27	No	No	10	50	No	No	DK019	Complex Partial	LRE	WNL	Normal	Spike-wave complex	1
F	44	No	Yes	25	15	No	No	DK021	Complex Partial, Secondary GTC	LRE	Hippo. scleosis	Rt HS	Spike-wave complex	1
F	26	No	No	19	0	No	No	DK023	Complex Partial	LRE	WNL		Spike-wave complex	0
M	27	No	No	13	15	No	No	DK028	Myoclonus, Primary GTC	IGE	WNL		Spike-wave complex	1
F	39	No	No	22	35	No	No	DK029	Complex Partial, Secondary GTC	LRE	WNL		Spike-wave complex	1
M	34	No	No	19	0	Yes	No	DK030	Primary GTC	IGE	WNL	normal	Spike-wave complex	0
F	24	No	No	18	0	No	No	DK031	Secondary GTC	LRE	WNL	normal	Spike-wave complex	0
F	27	Yes	No	24	0	No	No	DK032	Primary GTC	IGE	WNL	normal	WNL	0
M	50	No	No	20	15	No	No	DK036	Complex Partial	LRE	Others	Lt P-O encephalomalasia	Spike-wave complex	1
M	28	No	No	14	0	No	No	DK037	Secondary GTC	LRE	WNL	normal	Spike-wave complex	0
F	53	No	No	30	0	No	No	DK039	Complex Partial	LRE	Others	Rt parietal lobe focal abnormal signal	Spike-wave complex	0
M	45	No	Yes	15	20	No	No	DK042	Complex Partial	LRE	Others	AVM-postop	Spike-wave complex	1
M	43	No	No	22	0	No	No	DK043	Primary GTC	IGE	WNL	Normal	WNL	0
F	47	No	No	22	0	No	No	DK044	Complex Partial	LRE	WNL	Normal	WNL	0
F	20	No	No	13	0	No	No	DK046	Complex Partial, Secondary GTC	LRE	WNL	Normal	Spike-wave complex	0
M	39	Yes	Yes	12	15	No	No	DK048	Secondary GTC	LRE	Others	Frontal atrophy	Spike-wave complex	1
F	39	No	No	25	0	No	No	DK049	Secondary GTC	LRE	Others	LF frontal granulomatous lesion	Spike-wave complex	0
M	55	No	No	10	15	No	No	DK051	Complex Partial	LRE	WNL	Normal	Spike-wave complex	1
M	34	No	No	19	14	No	No	DK054	Complex Partial	LRE	TRAUMA		Spike-wave complex	1
F	37	No	No	7	30	Yes	No	DK055	Complex Partial	LRE		nd	Spike-wave complex	1
M	47	Yes	No	6	12	No	No	DK065	Complex Partial, Secondary GTC, Simple Partial (Motor)	LRE	WNL		WNL	1
F	56	No	No	46	0	No	No	DK066	Primary GTC	IGE	WNL	Normal	Spike-wave complex	0
F	37	No	No	21	30	No	No	DK070	Complex Partial	LRE	WNL	Normal	Spike-wave complex	1
M	38	No	No	35	0	No	No	DK072	Complex Partial	LRE	Hippo. scleosis		Spike-wave complex	0
M	52	No	No	31	0	No	No	DK073	Primary GTC	IGE	WNL	Normal	Spike-wave complex	0
M	69	No	No	65	0	No	No	DK074	Secondary GTC	LRE	WNL	Normal	Spike-wave complex	0
M	50	No	No	14	15	No	No	DK078	Complex Partial	LRE	WNL	Normal	Spike-wave complex	1
M	54	No	No	25	18	No	No	DK079	Complex Partial	LRE	WNL	Normal	Spike-wave complex	1
M	33	No	No	17	15	No	No	DK080	Complex Partial	LRE	WNL	Normal	Spike-wave complex	1
F	39	No	No	14	0	No	No	DK084	Complex Partial	LRE	WNL	Normal	Spike-wave complex	0
M	26	No	No	12	0	No	No	DK085	Complex Partial	LRE	WNL	Normal	Spike-wave complex	0
F	20	No	No	16	0	Unkown	No	DK086	Primary GTC	IGE	WNL	Normal	Spike-wave complex	0
F	37	Yes	No	15	150	No	No	DK094	Complex Partial, Secondary GTC, Simple Partial (Motor)	LRE	NMD		Spike-wave complex	1
F	35	No	No	12	50	Unkown	No	DK098	Complex Partial, Primary GTC, Secondary GTC	LRE	WNL	Normal	Spike-wave complex	1
M	39	No	No	20	20	Unkown	No	DK100	Secondary GTC	LRE	Others	Cerebral atrophy	WNL	1
F	45	No	No	12	100	No	No	DK101	Secondary GTC, Simple Partial (Motor)	LRE	WNL	Normal	WNL	1
F	32	No	No	22	12	No	No	DK102	Primary GTC, Secondary GTC, Simple Partial (Motor)	LRE	NMD		Spike-wave complex	1
F	49	No	No	21	0	No	No	DK104	Secondary GTC	LRE	WNL	Normal	Spike-wave complex	0
M	49	No	No	22	0	Unkown	No	DK107	Complex Partial	LRE	STROKE		Spike-wave complex	0
F	61	No	No	10	0	No	No	DK108	Complex Partial, Secondary GTC	LRE	WNL	Normal	WNL	0
M	40	No	No	3	0	No	No	DK116	Complex Partial, Secondary GTC	LRE	NMD		Spike-wave complex	0
F	61	No	No	58	0	No	No	DK120	Secondary GTC	LRE	WNL	Normal	WNL	0
F	64	No	No	8	24	No	No	EW001	Complex Partial, Secondary GTC	LRE	Hippo. scleosis	Rt.HS, Right frontal DVA	Spike-wave complex	1
M	40	No	No	23	18	No	No	EW003	Complex Partial, Secondary GTC	LRE	TRAUMA		Spike-wave complex	1
M	46	No	No	16	24	Yes	No	EW005	Complex Partial, Secondary GTC, Simple Partial (Motor)	LRE	TRAUMA		Spike-wave complex	1
M	29	No	No	13	0	Unkown	No	JN003	Secondary GTC	LRE	Others	chiari II malformation OP(+)	WNL	0
F	42	Yes	No	10	16	Yes	No	JN004	Complex Partial	LRE	WNL		Spike-wave complex	1
M	44	No	Yes	14	100	Unkown	No	JN005	Simple Partial (Motor)	LRE	NMD	cortical dysplasia	Spike-wave complex	1
F	31	No	No	18	0	No	No	JN006	Secondary GTC	UC	WNL		Spike-wave complex	0
M	28	No	No	9	0	Yes	No	JN007	Complex Partial, Secondary GTC	LRE	WNL		WNL	0
M	29	No	No	27	85	Unkown	Yes	JN008	Complex Partial, Secondary GTC	LRE	Hippo. scleosis	viral encephalitis	Spike-wave complex	1
M	20	No	No	12	0	Unkown	No	JN009	Myoclonus, Primary GTC	IGE	WNL		Spike-wave complex	0
F	55	Yes	No	12	50	Unkown	No	JN010	Complex Partial, Secondary GTC	LRE	Hippo. scleosis		Spike-wave complex	1
M	45	No	Yes	25	50	No	No	JN012	Complex Partial, Secondary GTC, Simple Partial (Motor)	LRE	TRAUMA		Spike-wave complex	1
F	44	Yes	No	33	30	No	No	JN020	Complex Partial	LRE		Brain CT: N-S	Slow only	1
F	34	No	No	17	0	No	No	JN021	Primary GTC	LRE	Others	Small sized focal cystic lesion in right temporal area	Slow only	0
F	25	Yes	No	5	22	Yes	No	JN023	, Complex Partial, Primary GTC	LRE	Hippo. scleosis	Mild diffuse brain atrophy	Spike-wave complex	1
M	47	No	No	6	17	Yes	Yes	JN026	Complex Partial, Secondary GTC	LRE	TRAUMA	Rt. TO focal atrophy	Spike-wave complex	1
M	50	No	No	36	12	Unkown	No	JN027	Complex Partial	LRE	WNL		Spike-wave complex	1
M	34	No	No	16	0	No	No	JN028	Primary GTC	LRE		Brain imaging study (-)	F7 SPIKES	0
M	44	No	No	24	17	Yes	No	JN030	Complex Partial	LRE	WNL		Spike-wave complex	1
M	30	No	No	14	20	No	No	JN034	Complex Partial, Secondary GTC, Simple Partial (Motor)	LRE	WNL	Brain CT: N-S	Spike-wave complex	1
M	51	No	No	41	0	Yes	No	JN036	Complex Partial, Secondary GTC	LRE	Others	Encephalomalacic change in left frontal lobe d/t R/O prev. traum or R/O sparganosis	Slow only	0
F	70	No	No	50	0	No	No	JN040	Complex Partial	LRE	Vas. Anomaly	R/O calcification or R/O cavernous angioma (5mm sized) in left parietal lobe	WNL	0
M	38	No	No	17	12	No	No	JN041	Complex Partial, Primary GTC	LRE	Others	Cerebellar atrophy, mild dilatation of entire ventricle	Slow only	1
F	41	No	No	2	62	No	No	JN044	Complex Partial, Secondary GTC, Simple Partial (Motor)	LRE	Hippo. scleosis	Rt. Hippocampal sclerosis	Slow only	1
F	54	No	No	16	0	No	No	JN046	Complex Partial	LRE	WNL		WNL	0
M	28	No	No	17	0	No	No	JN047	CPS, 2ND GTC	LRE	WNL	Arachnoid cyst	WNL	0
M	31	No	No	16	0	No	No	JN048	2ND GTC	LRE	WNL		Slow only	0
M	49	No	No	28	40	No	No	JN051	Complex Partial, Primary GTC, Secondary GTC	LRE	Hippo. scleosis		Spike-wave complex	1
F	22	No	No		19	No	No	JN053	Primary GTC	LRE	NMD	Cortical dysplasia, Colpocephaly	Spike-wave complex	1
M	35	No	No	25	0	No	No	JN055	Primary GTC	LRE	WNL		Spike-wave complex	0
M	37	No	No	7	31	No	No	JN056	Complex Partial, Primary GTC	LRE	Others	Multiple cortical and subcortical tubers with multiple tiny subependymal nodule in both lateral ventricle Imp) Tuberculous sclerosis	Slow only	1
M	54	No	No	36	0	No	No	JN057	Secondary GTC	LRE	WNL		Slow only	0
M	29	No	No	15	0	No	No	JN061	Complex Partial	LRE	WNL		Spike-wave complex	0
F	33	No	No	10	127	Yes	No	JN063	Complex Partial, Primary GTC, Secondary GTC	LRE	Hippo. scleosis	suspicious bilateral HS	Spike-wave complex	1
F	23	No	No	17	18	No	No	JN064	Complex Partial, GTC	LRE	WNL	Brain CT: N-S	Spike-wave complex	1
F	52	No	No	52	0	No	No	JN066	Complex Partial, GTC	LRE	WNL	focal atrophy at right hemisphere, Rt. CN atrophy	Spike-wave complex	0
M	21	No	No	17	0	No	No	JN068	NOCT GTC	LRE	WNL		Slow only	0
M	24	No	No	18	0	No	No	JN069	GTC	LRE	WNL		Spike-wave complex	0
M	60	No	No	33	100	Yes	No	JN072	Complex Partial	LRE	WNL		Spike-wave complex	1
M	63	No	No	47	0	No	No	JN074	Complex Partial	LRE	Others	In Brain CT , Hydrocephalus	WNL	0
F	27	No	No	22	0	Unkown	No	JN075	Complex Partial, , Secondary GTC	LRE	WNL		Slow only	0
M	45	No	No	31	28	Unkown	No	JN078	Complex Partial, Secondary GTC	LRE	Hippo. scleosis	Rt. HS	Spike-wave complex	1
M	54	No	No	45	0	Unkown	No	JN080	Myoclonus, Primary GTC, Secondary GTC	LRE	TRAUMA	Encephalomalacic change at Rt. Orbitofrontal cortex	WNL	0
F	45	No	No	6	40	No	Yes	JN081	Complex Partial, GTC	LRE	WNL	Brain CT: N-S	Spike-wave complex	1
M	43	No	No	39	0	No	No	JN083	Primary GTC	LRE	STROKE	Encephalomalacic change in Rt. BG & Frontal area	Slow only	0
F	32	No	No	10	12	Unkown	No	JN085	Complex Partial, GTC	LRE	WNL		Spike-wave complex	1
M	22	No	No	4	13	No	No	JN086	Secondary GTC	LRE	TUMOR	S/P of Craniopharyngioma & Evidence of right frontal cranioplasty and Mild atrophy of right inferior frontal and superior temporal gyri	Spike-wave complex	1
M	39	No	No	36	113	Unkown	No	JN089	Complex Partial	LRE	WNL		Slow only	1
M	84	No	No	66	0	No	No	JN091	Complex Partial	LRE	STROKE	Small vessel ds.	Spike-wave complex	0
M	50	No	No		17	No	No	JN092	Complex Partial, Secondary GTC	LRE	Hippo. scleosis	Rt. Temporoparietal atrophy, Rt. HS	WNL	1
M	39	No	Yes	10	80	Yes	No	JN093	Complex Partial, Secondary GTC	LRE	Others	evidence of left craniotomy, Encephalomalacic change in left Tempral lobe	Spike-wave complex	1
M	26	Yes	No	17	14	No	No	JN094	Complex Partial, Secondary GTC	LRE	WNL		Spike-wave complex	1
M	45	No	No	42	0	No	No	JN095	Secondary GTC	LRE	WNL		T5 SPIKES	0
F	32	Yes	No	17	169	Unkown	Yes	JN097	Complex Partial, Simple Partial (Motor)	LRE	Others	Diffuse atrophic change of right cerebral hemisphere and hippocampus	Spike-wave complex	1
M	20	No	No	13	0	Yes	No	JN101	, Primary GTC	IGE	WNL		Spike-wave complex	0
F	52	No	No	31	12	No	No	JN104	Complex Partial	LRE	WNL		Spike-wave complex	1
F	74	No	No	63	0	Unkown	No	JN107	Complex Partial	LRE	STROKE		WNL	0
M	32	No	No	18	23	Unkown	No	JN109	Complex Partial, Secondary GTC	LRE	TRAUMA		Spike-wave complex	1
F	33	No	No	14	0	No	No	JN110	Seondary GTC	LRE	WNL		Lt FT spikes	0
F	60	Yes	No	36	33	Yes	No	JN112	Complex Partial, Secondary GTC	LRE	STROKE		Spike-wave complex	1
M	38	No	No	11	0	No	No	JN114	Complex Partial	LRE	B-CT: Lt F low density		WNL	0
M	44	No	No	31	70	No	No	JN115	Complex Partial	LRE	WNL		WNL	1
F	37	No	No	22	0	No	No	JN116	Primary GTC	IGE	WNL		Spike-wave complex	0
F	32	No	No	16	37	No	No	JN125	Complex Partial, Secondary GTC	LRE	WNL		Spike-wave complex	1
M	48	No	Yes	25	54	No	No	JN126	Complex Partial, Secondary GTC	LRE	Others	Evidence of resection at Lt. F-T-P.	Spike-wave complex	1
F	51	No	No	24	0	No	No	JN128	Primary GTC?	UC		Brain imaging study (-)	WNL	0
F	43	No	No	29	87	Unkown	No	JN129	Complex Partial, Secondary GTC	LRE	Hippo. scleosis		Not done	1
M	32	No	No	21	0	No	No	JN130	Complex Partial, Primary GTC	LRE	WNL		WNL	0
M	25	No	No	12	0	Yes	No	JN133	Secondary GTC	LRE	WNL		Spike-wave complex	0
F	52	No	No	29	0	Yes	No	JN134	Secondary GTC	LRE	NMD		Spike-wave complex	0
M	57	No	No	10	42	Unkown	No	JN135	Complex Partial, Primary GTC, Secondary GTC, Simple Partial (Motor)	LRE	TRAUMA	Encephalomalacia in right occipital lobe	Spike-wave complex	1
F	22	Yes	No	18	0	No	No	JN138	Complex Partial	LRE	WNL		Spike-wave complex	0
M	68	No	No	54	0	No	No	JN141	NOCT GTC	LRE	WNL		WNL	0
M	22	Yes	No	17	0	No	No	JN142	Complex Partial, Secondary GTC	LRE	WNL		Slow only	0
F	29	No	No	19	0	Yes	No	JN144	Complex Partial, Secondary GTC	LRE	WNL		Slow only	0
M	37	No	No	31	0	No	No	JN146	Secondary GTC	LRE	WNL		Spike-wave complex	0
M	61	No	No	14	0	No	No	JN147	Myoclonus, Primary GTC	IGE		ND	Spike-wave complex	0
F	28	Yes	No	17	0	Yes	No	JN153	Primary GTC	LRE	WNL		Lt T SPIKE	0
M	31	No	No	7	22	Unkown	Yes	JN155	Complex Partial, Primary GTC, Secondary GTC	LRE	WNL	Brain CT: N-S	Spike-wave complex	1
F	42	No	No	31	22	Yes	No	JN156	Complex Partial	LRE		ND	Spike-wave complex	1
M	53	No	No	13	14	No	No	JN157	, Complex Partial	LRE	WNL	Brain CT: N-S	Spike-wave complex	1
F	35	No	No	9	22	No	No	JN159	Complex Partial, Primary GTC, Secondary GTC	IGE	WNL		Spike-wave complex	1
M	72	No	No	68	0	No	No	JN161	Complex Partial	LRE	WNL		F7 spikes	0
M	50	No	No		42	No	No	JN162	Complex Partial, Simple Partial (Motor)	LRE	Hippo. scleosis		Spike-wave complex	1
F	22	No	No	12	23	No	No	JN165	, Complex Partial, Myoclonus, Primary GTC, Simple Partial (Motor)	LRE	WNL		FLE with Bilateral synchrony	1
F	53	No	No	48	0	No	No	JN166	Primary GTC	LRE	WNL		WNL	0
M	68	No	No	10	30	Yes	No	JN167	Complex Partial,2nd GTC	LRE	WNL		Spike-wave complex	1
M	30	No	No	1	26	No	No	JN168	Complex Partial, Primary GTC, Simple Partial (Motor)	LRE	WNL	Brain CT: N-S	Lt frontal spikes.	1
M	41	No	No	7	0	No	미상	JN169	Primary GTC	LRE	TRAUMA	Encephalomalacic change in left inferior parietal lobule and posterior superior temporal gyrus	WNL	0
M	36	No	No	32	0	Yes	No	JN172	Secondary GTC	LRE	TRAUMA	Encephalomalacic lesions in both anterior frontal lobes and left temporal lobe	Spike-wave complex	0
M	22	No	No	15	0	Yes	No	JN173	Primary GTC	IGE	WNL		Spike-wave complex	0
M	44	No	No	30	0	Unkown	No	JN176	Complex Partial, Secondary GTC	LRE	STROKE		WNL	0
M	21	No	No	17	0	Unkown	No	JN178	noct GTC	LRE	WNL		Lt F --> GSWC	0
M	25	No	No	19	0	Unkown	No	JN180	Primary GTC	UC	WNL		WNL	0
F	36	No	No	6	18	No	No	JN184	Complex Partial, Secondary GTC	LRE		ND	Spike-wave complex	1
M	23	No	No	15	0	No	No	JN185	Primary GTC	UC	WNL		Slow only	0
F	53	No	No	17	0	No	No	JN193	2ND GTC, Simple Partial (Motor)	LRE		Brain imaging study (-)	Slow only	0
F	39	No	No	3	12	No	No	JN196	Complex Partial, Primary GTC, Secondary GTC, Simple Partial (Motor)	LRE	Others	Severe Communicating hydrocephalus	Spike-wave complex	1
F	39	No	No	35	0	Unkown	No	JN197		LRE	TRAUMA	Evidence of Lt. parietal craniotomy	Spike-wave complex	0
M	43	No	No		0	No	No	JN199		IGE	Others	Brain CT : WNL	Slow only	0
M	34	Yes	No	32	0	No	No	JN200	NOTC GTC	LRE	WNL		Lt FT spikes	0
M	21	No	No	18	0	No	No	JN204	NOCT GTC	LRE	WNL		WNL	0
F	35	No	No	30	0	No	No	JN207	Complex Partial	LRE	WNL		WNL	0
M	24	No	No	20	0	No	No	JN210	Primary GTC	UC	WNL		WNL	0
M	56	No	No	45	0	Unkown	No	JN214	Complex Partial	LRE	Vas. Anomaly	Cavernous angioma at Lt. T	WNL	0
F	28	No	No	26	0	Unkown	No	JN216	Complex Partial, Secondary GTC	LRE	STROKE	Evidence of craniotomy at both F, Encephalomalacic change at Lt. frontal lobe ( d/t AVM rupture)	Spike-wave complex	0
M	34	No	No	17	0	Unkown	No	JN217	Secondary GTC	LRE		ND	WNL	0
M	55	Yes	No	19	12	No	No	JN220	Complex Partial, Primary GTC	LRE	WNL		Lt T SPIKES	1
F	66	No	No	60	0	Yes	No	JN222	GTC	LRE	WNL		Spike-wave complex	0
F	65	No	No	55	0	No	No	JN224	Secondary GTC	LRE	WNL		Slow only	0
F	33	No	No	17	0	Yes	No	JN225	GTC	LRE	NMD	Cortical dysplasia and polygyria in left parietal & both frontal areas	Slow only	0
M	35	No	No	25	0	No	No	JN226	Primary GTC	LRE	WNL		Lt T SPIKES	0
M	32	No	No	19	0	Yes	No	JN228	Primary GTC	IGE	WNL		Slow only	0
F	58	Yes	No	34	17	No	No	JN229	Complex Partial, Simple Partial (Motor)	LRE	WNL	Brain CT: N-S	Slow only	1
F	40	No	No	4	12	No	No	JN235	Complex Partial, Secondary GTC, Simple Partial (Motor)	LRE		ND	Spike-wave complex	1
F	43	No	Yes	8	311	No	Yes	JN236	Complex Partial, Secondary GTC	LRE	WNL	Postsurgical change right F-T	F4 SPIKES	1
F	34	Yes	No	16	0	No	No	JN238	Primary GTC	LRE		ND	F3 SPIKES	0
F	45	Yes	No	32	0	No	No	JN239	Complex Partial, Myoclonus, Primary GTC	LRE	Hippo. scleosis		Spike-wave complex	0
F	37	No	No	25	0	No	No	JN240	Primary GTC	LRE	WNL		Slow only	0
M	30	Yes	No	12	0	No	No	JN244	Complex Partial, Secondary GTC	LRE	Others	Focal ectatic change of temporal horn	WNL	0
M	37	Yes	No	12	50	No	No	JN245	Complex Partial, Secondary GTC	LRE	Others	Lt. Middle cerebellar hypodensity in Brain CT	Spike-wave complex	1
M	21	Yes	No	14	16	Yes	No	JN251	Complex Partial, Secondary GTC, Simple Partial (Motor)	LRE	Others	Destructive encephalopathy at posterior quadrant of Lt. hemisphere - Encephalomalacic change in left parietal lobe with porencephalic change in left lateral ventricle	Spike-wave complex	1
F	31	No	No	18	24	No	No	KG001	Complex Partial, Secondary GTC, Simple Partial (Motor)	LRE	WNL	NMD	Spike-wave complex	1
F	32	No	No	0	24	No	No	KG010	Complex Partial, Secondary GTC	LRE	Others	hippocampal sclerosis	WNL	1
M	20	No	No	6	48	No	No	KG011	Secondary GTC	LRE	Others	Traumatic Hemorrhage	Slow only	1
M	43	Yes	No	38	24	No	No	KG012	Complex Partial, Secondary GTC	LRE	Others	Traumatic brain injury	Slow only	1
F	21	Yes	No	13	12	No	No	KG015	Myoclonus, Primary GTC	IGE	WNL		Spike-wave complex	1
M	67	No	No	45	24	No	No	KG019	Complex Partial, Secondary GTC	LRE	Others	Traumatic cerebromalacia	WNL	1
F	42	No	No	20	48	No	No	KG020	Complex Partial, Secondary GTC	LRE	WNL		WNL	1
M	26	No	No	18	24	No	No	KG024	Complex Partial, Secondary GTC	LRE	Others	Rt amygdala enlargement R/O FCD	Spike-wave complex	1
M	23	No	No	18	0	No	No	KH003	Secondary GTC	LRE	WNL		WNL	0
F	37	No	No	12	12	Unkown	No	KH005	Secondary GTC, Simple Partial (Motor)	LRE	WNL		Spike-wave complex	1
M	75	No	No	41	0	No	No	KH007	Secondary GTC	LRE	Others	encephalomalacia in Lt ant-lat temporal lobe	Slow only	0
M	35	No	No	17	0	Yes	Yes	KH009	Myoclonus, Secondary GTC, Simple Partial (Motor)	IGE	Hippo. scleosis	Bilateral symmetric appearance of hippocampus	Spike-wave complex	0
M	28	No	No	19	0	No	No	KH010	Secondary GTC	LRE	TUMOR	cystic lesion in Lt frontal supragyrus (4X3.4X4.5 츠)	WNL	0
F	54	Yes	No	49	0	No	No	KH011	Secondary GTC	LRE	Hippo. scleosis	both HA	WNL	0
F	43	No	No	34	0	No	No	KH013	Secondary GTC	IGE	WNL		Spike-wave complex	0
F	45	Yes	No	37	0	No	No	KH015	Secondary GTC	LRE	Hippo. scleosis	suspicious Lt HA.	WNL	0
F	42	Yes	No	34	12	No	No	KH016	Secondary GTC	LRE	Hippo. scleosis	suspicious Rt HA.	WNL	1
F	64	No	No	56	0	Unkown	No	KH021	Secondary GTC	LRE	TRAUMA	Encephalomalatic change, left frontal and right temporofrontal lobe.	Spike-wave complex	0
F	63	No	No	22	380	Unkown	No	KH024	Secondary GTC	LRE	Hippo. scleosis	Encephalomalacia at left lingual gyrus	Spike-wave complex	1
F	56	No	No	31	60	No	No	KH026	Complex Partial, Secondary GTC	LRE	Others	C/W mesial temporal sclerosis, right.	WNL	1
M	49	No	No	10	50	Unkown	No	KH027	Complex Partial, Secondary GTC	LRE	WNL		Spike-wave complex	1
M	70	No	No	45	0	No	No	SC003	Primary GTC, Secondary GTC	UC	WNL		WNL	0
M	56	No	No	43	360	Yes	No	SC008	Complex Partial, Secondary GTC	LRE	WNL		WNL	1
M	24	No	No	15	0	No	No	SC009	Complex Partial, Secondary GTC	LRE	WNL		Spike-wave complex	0
F	20	No	No	18	0	No	No	SC010	Primary GTC	UC	WNL		Spike-wave complex	0
F	49	Yes	No	17	120	No	No	SU004	Complex Partial	LRE		ND	WNL	1
F	26	No	No	1	120	No	No	SU005	Complex Partial	LRE	Hippo. scleosis	Rt HS	WNL	1
F	41	No	No	10	0	No	No	SU007	Complex Partial, Secondary GTC	LRE		ND	Spike-wave complex	0
F	37	No	No	13	0	No	Yes	SU010	Myoclonus	LRE	TUMOR	Focal cerebromalacia in the left frontal lobe. -- probable previous op site.	WNL	0
F	31	No	No	20	120	No	No	SU012	Complex Partial	LRE	Others	Herpes simplex encephalitis	Spike-wave complex	1
M	30	No	No	18	60	No	No	SU013	Complex Partial, Simple Partial (Motor)	LRE	NMD	pachygyria, Lt. frontal, abscence of septum pellucidum	Spike-wave complex	1
M	48	No	No	17	96	No	No	SU014	Complex Partial	LRE	Vas. Anomaly	S/P craniotomy & cerebromalacia, left parieto-temporal d/t AVM	Spike-wave complex	1
M	35	No	No	13	0	No	No	SU015	Secondary GTC	LRE		ND	Spike-wave complex	0
F	44	Yes	No	7	30	No	No	SU018	Complex Partial, Secondary GTC	LRE	WNL		Spike-wave complex	1
F	22	Yes	No	4	54	Yes	Yes	SU021	Complex Partial, Secondary GTC	LRE	WNL		Spike-wave complex	1
M	20	No	Yes	1	60	No	No	SU022	Complex Partial, Secondary GTC	LRE	Vas. Anomaly	Minute venous angioma, Rt. frontal.	Slow only	1
M	33	Yes	No	21	96	No	No	SU023	Complex Partial	LRE	NMD	FCD/polymicrogyria, Rt. Perisylvian cortex.	Spike-wave complex	1
F	33	No	No	13	192	Yes	No	SU024	Complex Partial	LRE	Others	r/o Rt. Temporal ependymal cyst	Spike-wave complex	1
F	31	No	No	19	1000	No	No	SU025	Complex Partial	LRE	WNL		Spike-wave complex	1
F	47	No	No	22	48	No	No	SU027	Complex Partial	LRE	Hippo. scleosis	Rt. Hippocampal atrophy, suspicious sclerosis	Spike-wave complex	1
F	34	No	No	9	0	No	No	SU030	Complex Partial	LRE	Others	1. Probable old cerebromalacia , Lt cerebral hemisphere ( whole MCA territory ) and ipsilateral lateral ventricular dilatation 2. Diffuse atrophy of Lt cerebral hemisphere / brainstem	Spike-wave complex	0
F	40	No	No	6	72	No	No	SU031	Complex Partial	LRE		ND	WNL	1
F	20	No	No	10	0	No	No	SU032	Complex Partial	LRE	WNL		WNL	0
F	25	No	No	0	0	Yes	No	SU033	Complex Partial	LRE	WNL		Spike-wave complex	0
M	40	No	No	0	100	No	No	SU036	Complex Partial	LRE	NMD	1. Subependymal heterotopia in both lateral ventricles --> periventricular diffuse type, most likely 2. Cerebellar atrophy --> probably due to AED	Spike-wave complex	1
F	28	No	No	17	0	No	No	SU038	Primary GTC	IGE	WNL		Spike-wave complex	0
F	25	No	No	12	0	No	No	SU039		LRE	WNL		WNL	0
F	25	No	No	12	0	No	No	SU041	Secondary GTC	LRE	stroke	minor PVL, combined with ischemic embolic infarct, probably old lesion, Lt. parietal area	Slow only	0
M	20	No	No	14	0	No	No	SU042	Primary GTC	IGE	WNL		Spike-wave complex	0
M	24	No	No	7	0	Yes	No	SU044	Primary GTC	LRE	NMD	Corpus callosum agenesis	WNL	0
M	33	No	No	5	1000	No	No	SU045	Complex Partial	LRE		ND	Spike-wave complex	1
M	21	No	No	3	0	Yes	No	SU046	Complex Partial, Secondary GTC	LRE	Vas. Anomaly	No signicant interval change of focal high signal intensity in left frontal lobe. -- Vascular malformation such as venous angioma.	Spike-wave complex	0
M	26	No	No	0	30	Yes	No	SU048	Secondary GTC	LRE	Others	About 5 cm arachnoid cyst in the Rt middle cranial fossa	Spike-wave complex	1
M	29	No	No	9	540	No	No	SU049	Myoclonus	IGE		ND	Spike-wave complex	1
F	25	No	Yes	4	1000	No	No	SU050	Simple Partial (Motor)	LRE	WNL		Spike-wave complex	1
M	32	No	No	13	0	No	No	SU055	Primary GTC	IGE	WNL		Spike-wave complex	0
F	29	No	No	10	12	No	No	SU056	Complex Partial	LRE	Others	- arachnoid cyst in Lt temporal lobe - cerebromalatic change at Lt. parietal lobee	WNL	1
F	57	No	No	12	24	No	No	SU057	Secondary GTC	LRE		ND	Spike-wave complex	1
F	23	No	No	17	800	No	No	SU058	Complex Partial	LRE	WNL		Spike-wave complex	1
M	25	No	No	20	15	No	No	SU059	Complex Partial	LRE	WNL		Spike-wave complex	1
F	28	No	No	18	120	No	No	SU061	Complex Partial	LRE	WNL		Spike-wave complex	1
F	38	No	No	7	34	Yes	No	SU063	Complex Partial, Secondary GTC	LRE	Others	Symmetric encephalomalatic changes in bilateral F-P-O-T lobe.	Spike-wave complex	1
F	43	No	No	18	0	No	No	YC002	Secondary GTC	LRE	WNL		WNL	0
M	52	No	No	7	24	No	No	YC004	Complex Partial, Secondary GTC	LRE	WNL		Spike-wave complex	1
F	57	Yes	No	45	0	No	No	YC006	Secondary GTC	LRE	WNL		Spike-wave complex	0
M	34	No	No	2	50	Yes	No	YC009	Complex Partial, Secondary GTC	LRE	WNL		Spike-wave complex	1
F	50	No	No	37	0	No	No	YC013	Complex Partial, Secondary GTC	LRE	WNL		Spike-wave complex	0
M	37	No	No	13	12	Unkown	No	YK001	Complex Partial	LRE	Others	Rt. MTS	Spike-wave complex	1
M	40	No	No	20	0	No	No	YK002	Secondary GTC	LRE	WNL		WNL	0
F	37	No	No	34	0	No	No	YK006	Secondary GTC	LRE	WNL		Spike-wave complex	0
